# Supplementary material
Source: Elsevier journal article supplement (https://www.sciencedirect.com/science/article/pii/S0300893220305510)
Supplement: mmc1 [file S0300893220305510:mmc1.pdf]

## **A new twist to HeartMate 3 low flow alarms**

### **SUPPLEMENTARY DATA**

**Video 1 of the supplementary data.** Angiogram of the outflow graft confirming a twist in the last portion near the connection with the pump.

**Video 2 of the supplementary data.** Perioperative transesophageal echocardiogram showing the aortic valve before (A) and after (B) untwisting the outflow graft.
